# Supplementary material for: Proteome-pI: proteome isoelectric point database
Source: PubMed Central journal article supplement — Nucleic Acids Res. 2016 Oct 25;45(Database issue):D1112–6. doi: 10.1093/nar/gkw978 (PMC5210655; doi:10.1093/nar/gkw978), 2016-10-25
Supplement: gkw978_supp.pdf [file gkw978_supp.pdf]

## Supplementary data

### **Proteome-*pI*: Proteome Isoelectric Point Database**

**Lukasz P. Kozlowski<sup>1,\*</sup>**

<sup>1</sup> Quantitative and Computational Biology Group, Max Planck Institute for Biophysical Chemistry, Göttingen, Lower Saxony, 37077, Germany

\* Corresponding author: [lukasz.kozlowski.lpk@gmail.com](mailto:lukasz.kozlowski.lpk@gmail.com)

Database web address: <http://isoelectricpointdb.org>

**Supplementary table S1.** Detailed statistics of the Proteome-*pl* database

|                            | IDM number<br>of proteins | Median number<br>of protein | IDM size<br>of proteins | Median size<br>of protein | IDM mw<br>of proteins | Median mw<br>of protein |
|----------------------------|---------------------------|-----------------------------|-------------------------|---------------------------|-----------------------|-------------------------|
| Viruses                    | 22                        | 7                           | 225                     | 182                       | 26                    | 21                      |
| Archaea                    | 2,254                     | 2,065                       | 255                     | 241                       | 28                    | 27                      |
| Bacteria                   | 3,011                     | 2,950                       | 279                     | 265                       | 31                    | 29                      |
| Eukaryote (all isoforms)   | 13,187                    | 11,684                      | 369                     | 336                       | 41                    | 37                      |
| Eukaryote (main isoform)   | 12,618                    | 11,585                      | 367                     | 334                       | 41                    | 37                      |
| Eukaryote (minor isoforms) | 387                       | 15                          | 407                     | 362                       | 45                    | 40                      |

mw - molecular weight in kDa; IDM - interdecile mean

**Supplementary table S2.** Di-amino acid frequency in the Proteome-*pl* database (average from 5,029 proteomes)

|     | Ala  | Cys  | Asp  | Glu  | Phe  | Gly  | His  | Ile  | Lys  | Leu  | Met  | Asn  | Pro  | Gln  | Arg  | Ser  | Thr  | Val  | Trp  | Tyr  |
|-----|------|------|------|------|------|------|------|------|------|------|------|------|------|------|------|------|------|------|------|------|
| Ala | 9.16 | 1.12 | 4.67 | 5.48 | 3.21 | 6.70 | 1.77 | 4.57 | 3.96 | 8.98 | 2.18 | 2.79 | 4.13 | 3.28 | 5.16 | 5.93 | 4.83 | 6.38 | 1.06 | 2.21 |
| Cys | 1.01 | 0.30 | 0.73 | 0.73 | 0.58 | 1.12 | 0.36 | 0.73 | 0.64 | 1.30 | 0.29 | 0.52 | 0.72 | 0.49 | 0.80 | 1.06 | 0.72 | 0.88 | 0.18 | 0.41 |
| Asp | 4.80 | 0.69 | 3.24 | 4.03 | 2.30 | 4.21 | 1.17 | 3.26 | 2.64 | 5.28 | 1.26 | 2.01 | 2.85 | 1.80 | 3.02 | 3.46 | 2.73 | 3.84 | 0.78 | 1.77 |
| Glu | 5.58 | 0.71 | 3.58 | 4.76 | 2.15 | 3.85 | 1.38 | 3.74 | 4.11 | 6.06 | 1.60 | 2.72 | 2.48 | 2.70 | 4.00 | 3.69 | 3.32 | 4.08 | 0.75 | 1.74 |
| Phe | 3.15 | 0.63 | 2.40 | 2.25 | 1.70 | 2.97 | 0.88 | 2.22 | 1.81 | 3.79 | 0.87 | 1.63 | 1.72 | 1.35 | 1.94 | 3.03 | 2.20 | 2.66 | 0.53 | 1.29 |
| Gly | 5.99 | 0.99 | 3.77 | 4.14 | 2.94 | 5.33 | 1.62 | 4.05 | 3.74 | 6.59 | 1.77 | 2.63 | 2.81 | 2.50 | 4.22 | 5.02 | 4.02 | 4.96 | 1.04 | 2.27 |
| His | 1.77 | 0.38 | 1.17 | 1.23 | 0.96 | 1.66 | 0.72 | 1.21 | 0.94 | 2.29 | 0.49 | 0.82 | 1.40 | 0.94 | 1.42 | 1.52 | 1.16 | 1.44 | 0.32 | 0.73 |
| Ile | 4.84 | 0.83 | 3.35 | 3.54 | 2.22 | 3.85 | 1.21 | 3.08 | 2.95 | 5.10 | 1.15 | 2.42 | 2.77 | 1.97 | 2.88 | 4.04 | 3.14 | 3.75 | 0.61 | 1.68 |
| Lys | 4.05 | 0.61 | 2.85 | 3.84 | 1.69 | 3.08 | 1.10 | 3.13 | 3.64 | 4.73 | 1.31 | 2.47 | 2.37 | 2.11 | 3.03 | 3.35 | 2.89 | 3.25 | 0.58 | 1.63 |
| Leu | 9.04 | 1.35 | 5.39 | 5.90 | 3.75 | 6.53 | 2.22 | 4.99 | 5.06 | 9.02 | 2.14 | 3.69 | 5.21 | 3.88 | 5.83 | 7.21 | 5.35 | 6.42 | 1.11 | 2.59 |
| Met | 2.22 | 0.27 | 1.27 | 1.46 | 0.80 | 1.54 | 0.48 | 1.26 | 1.38 | 2.21 | 0.61 | 1.00 | 1.18 | 0.91 | 1.33 | 1.70 | 1.41 | 1.52 | 0.23 | 0.57 |
| Asn | 2.95 | 0.55 | 2.07 | 2.32 | 1.58 | 2.86 | 0.87 | 2.54 | 2.16 | 3.72 | 0.92 | 1.94 | 2.15 | 1.54 | 1.98 | 2.75 | 2.13 | 2.51 | 0.50 | 1.33 |
| Pro | 4.64 | 0.56 | 2.89 | 3.47 | 1.87 | 3.62 | 1.12 | 2.31 | 2.21 | 4.49 | 1.02 | 1.79 | 2.97 | 1.95 | 2.63 | 3.97 | 2.89 | 3.58 | 0.61 | 1.37 |
| Gln | 3.37 | 0.47 | 1.81 | 2.42 | 1.34 | 2.35 | 0.97 | 2.13 | 2.11 | 3.87 | 0.96 | 1.59 | 1.96 | 2.27 | 2.46 | 2.51 | 2.05 | 2.46 | 0.49 | 1.09 |
| Arg | 4.87 | 0.77 | 3.10 | 3.75 | 2.27 | 3.69 | 1.46 | 3.17 | 3.04 | 5.86 | 1.43 | 2.13 | 2.82 | 2.37 | 4.12 | 3.82 | 2.98 | 3.72 | 0.82 | 1.73 |
| Ser | 5.73 | 1.00 | 3.70 | 3.89 | 2.93 | 5.34 | 1.57 | 3.81 | 3.43 | 6.86 | 1.61 | 2.82 | 3.84 | 2.64 | 3.91 | 5.89 | 4.16 | 4.56 | 0.89 | 2.03 |
| Thr | 5.04 | 0.74 | 2.88 | 3.11 | 2.16 | 4.26 | 1.18 | 3.14 | 2.51 | 5.48 | 1.17 | 2.07 | 3.33 | 1.90 | 2.81 | 4.10 | 3.29 | 4.09 | 0.68 | 1.58 |
| Val | 6.24 | 0.96 | 3.90 | 4.25 | 2.69 | 4.51 | 1.44 | 3.75 | 3.26 | 6.74 | 1.56 | 2.51 | 3.40 | 2.34 | 3.78 | 4.72 | 3.97 | 4.82 | 0.81 | 1.88 |
| Trp | 0.94 | 0.18 | 0.68 | 0.69 | 0.51 | 0.80 | 0.31 | 0.69 | 0.67 | 1.37 | 0.34 | 0.55 | 0.52 | 0.56 | 0.86 | 0.85 | 0.70 | 0.78 | 0.22 | 0.37 |
| Tyr | 2.20 | 0.47 | 1.72 | 1.71 | 1.35 | 2.13 | 0.71 | 1.61 | 1.44 | 2.93 | 0.64 | 1.29 | 1.34 | 1.19 | 1.74 | 1.99 | 1.58 | 1.84 | 0.40 | 1.04 |

\* Similar statistics for all 5,029 proteomes, grouped proteomes from different kingdoms of life are available online in "[Statistics](#)" section and on individual subpages of the database.

All values are presented as per milles (‰), therefore need to be multiplied by 10<sup>-3</sup>. For better visibility di amino acids which are more than expected are marked by red, and those which are underrepresented are marked by blue in the table.

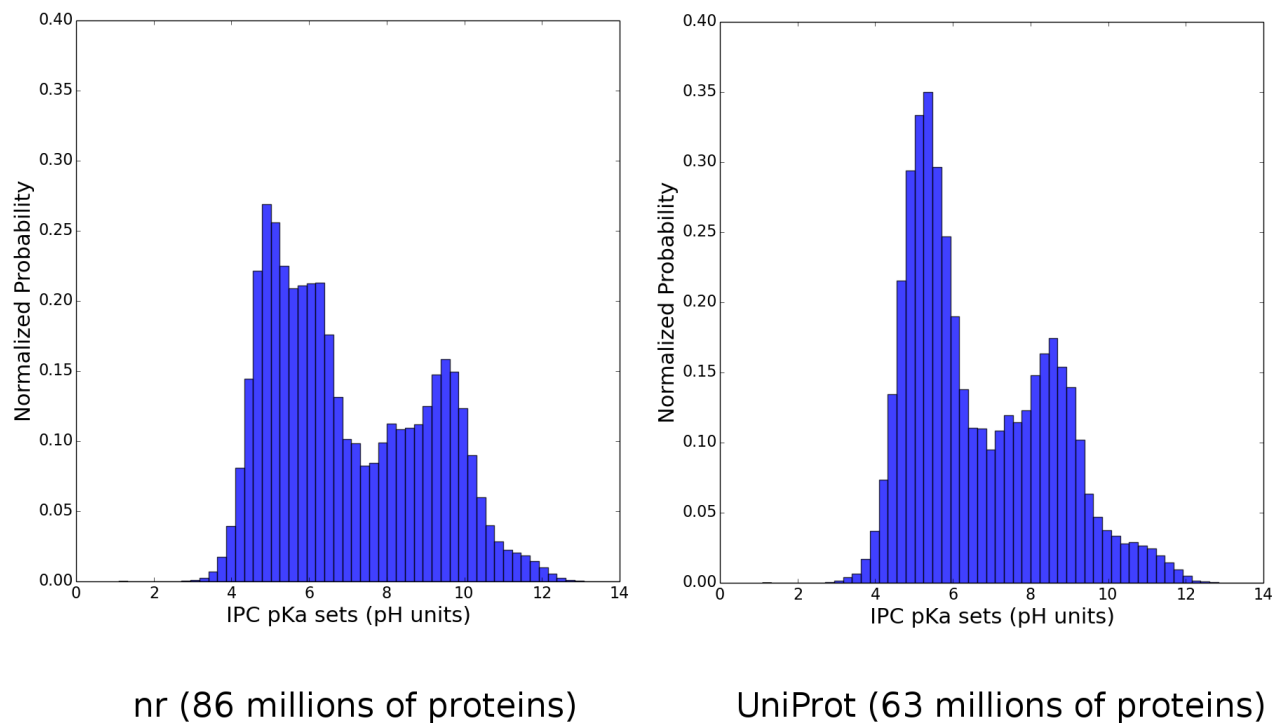

**Supplementary Figure S1.** Isoelectric point distributions for proteins from *nr* and UniProt databases

### Isoelectric point for biological databases

Pre-computed data with isoelectric point for *nr*, UniProt and PDB databases are available as separate files from RepOD repository:

Isoelectric point for all *nr* (non redundant) NCBI proteins (86 million proteins) April 2016. RepOD. <http://dx.doi.org/10.18150/repod.2872103>

Isoelectric point for UniProtKB/TrEMBL proteins (63 million proteins) April 2016 RepOD. <http://dx.doi.org/10.18150/repod.9948646>

Isoelectric point for PDB proteins (~339,000proteins) Dec 2015. RepOD. <http://dx.doi.org/10.18150/repod.1549954>
